# Supplementary material for: Quantifying climate change impacts emphasises the importance of managing regional threats in the endangered Yellow-eyed penguin
Source: PeerJ. 2017 May 16;5:e3272. doi: 10.7717/peerj.3272 (PMC5436559; doi:10.7717/peerj.3272)
Supplement: Supplemental Information 6 [file peerj-05-3272-s006.xlsx]

## Sheet: encounter History
BIRD ID	sex	1982	1983	1984	1985	1986	1987	1988	1989	1990	1991	1992	1993	1994	1995	1996	1997	1998	1999	2000	2001	2002	2003	2004	2005	2006	2007	2008	2009	2010	2011	2012	2013	2014	2015
2279				1	2	2	2	2	2	2	2	2	2	3	3	3	3	4	3	3	3	5															0	banded as non-breeding adult
2430			1	5																																	1	year born
2431	M			3	5																																2	pre-breeding
2432			1	5																																	3	recorded breeder
2434				3	3	4	3	3	3	3	4	4	3	3	3	3	3	3	5																		4	skipped breeding / not seen
2435				3	5																																5	senescent / (presumed) dead
2436				3	5
2437			1	5
2438			1	5
2439				3	5
2440	F			3	3	3	3	3	3	5
2441	M			3	5
2442				3	5
2443	F			3	4	3	3	3	5
2444				3	5
2446				3	3	3	3	4	3	5
2447				3	4	4	3	3	3	4	3	3	3	3	3	3	5
2448	F			3	5
2456	M			3	3	3	5
2457				3	3	4	4	4	4	4	4	3	3	3	3	3	3	3	5
2458	F			3	4	4	4	4	4	4	3	5
2459			1	5
2460	F			3	4	3	3	5
2616	M			3	3	5
2617			1	5
2618					3	5
2619				0	5
2632			1	5
2633					3	5
2634				0	5
2639			1	5
2662				1	5
2663				1	5
2669				1	5
2670				3	3	4	4	4	4	4	3	3	3	4	4	3	3	3	5
2701				3	4	3	5
2702	M			3	4	4	4	4	4	3	3	3	4	4	3	5
2703				3	4	3	3	4	4	4	4	4	3	3	3	3	3	3	3	5
2704				3	3	3	3	4	4	3	3	3	3	3	3	3	3	3	3	3	3	4	3	3	3	4	3	5
2705				3	3	5
2706	F			3	3	5
2707				3	3	3	4	4	4	4	4	3	3	3	4	3	5
2708	M			3	3	3	5
2709				3	4	3	3	5
2710				3	3	3	5
2711	F			3	3	5
2712	M			3	3	3	3	5
2713				3	5
2714	F			3	3	3	4	4	4	3	3	5
2715				3	4	3	3	5
2716				3	3	3	4	4	4	4	4	3	3	3	5
2717				3	5
2792				1	5
2793				1	5
2932				1	5
2933				1	2	2	2	2	3	5
2934				1	5
2935				1	5
2936			1	5
2937				1	5
2938	F			1	5
2939				1	5
2940				1	5
2941				1	5
2942				1	5
2943				1	5
2944				1	5
2945				1	5
2946				1	5
2947				1	5
2948				1	5
2949				1	5
2950				1	5
2951				1	5
2952				1	5
2953				1	5
2954				1	5
2955				1	5
2956				1	5
2957				1	5
2958				1	5
2959				1	5
2960				1	5
2961				1	5
2962					3	3	3	4	4	4	3	4	3	3	3	3	3	3	5
2963				1	5
2964				1	5
2965				1	5
2966				1	2	2	2	2	2	2	3	3	3	3	4	4	4	4	3	3	3	3	3	4	3	5
2967				1	5
2968				1	5
2969				1	5
2970				0	5
2971				1	5
2972				1	5
2973				1	5
2974				1	5
2981			1	2	2	2	2	2	2	3	4	3	3	3	3	5
3004				1	5
3005				1	5
3006				1	2	2	2	3	3	5
3007				1	5
3008				1	5
3009				1	5
3010				1	5
3011				1	5
3012				1	5
3013				1	5
3014				1	5
3015				1	5
3016				1	5
3036				1	5
3037				1	5
3038				1	5
3091				1	5
3092				1	5
3093				1	5
3094				1	5
3095				1	5
3096				1	5
3097				0	5
3856	M				3	4	4	4	4	3	3	3	5
3958								3	5
4585	M									3	3	3	5
4586				0	5
4587			1	5
4588			1	5
5601				1	5
5602				1	5
5603				1	5
5604	M			1	2	2	2	2	2	3	3	3	3	3	3	3	3	3	3	3	3	3	3	5
5605				1	5
5606				1	5
5607				1	5
5608				1	5
5609				1	5
5610				1	5
5611				1	5
5612				1	5
5613				1	5
5614				1	5
5615				1	2	2	2	2	2	2	2	2	3	5
5616				1	5
5617				1	5
5618				1	5
5619				1	5
5620				1	5
5621				1	5
5622				1	5
5623				1	5
5624				1	5
5625				1	5
5626				1	5
5627				1	5
5628				1	5
5629				1	5
5630				1	5
5631				1	5
5632				1	5
5633				1	5
5634				1	5
5635				1	5
5636				1	5
5637				1	5
5638				1	5
5639				1	5
5640				1	5
5641				1	5
5642				1	5
5643				1	5
5644				1	5
5645				1	5
5646				1	5
5647				1	5
5648				1	5
5649				1	5
5650				1	5
5801				1	5
5802				1	5
5803				1	5
5804				1	5
5805				1	5
5806				1	5
5807				1	5
5808				1	5
5809				1	5
5810				1	5
5811				1	5
5812				1	5
5813				1	5
5814				1	5
5815				1	5
5816				1	5
5817				1	5
5818				1	5
5819				1	5
5820				1	5
5821				1	5
5822				1	5
5823				1	5
5824				1	5
5825				1	5
5826				1	5
5827				1	5
5828				0	5
5829				1	5
5830				1	5
5831				1	5
5832				1	2	2	2	2	2	3	3	3	3	3	3	3	5
5833				1	5
5834				1	5
5835				1	5
5836				1	5
5837				1	5
5838				1	5
5839				1	5
5840				1	5
5841				1	5
5842				1	5
5843				1	5
5844				1	5
5845				1	5
5846				1	5
5847			1	5
5848			1	5
5849			1	5
5850					3	5
5901				1	5
5902				1	5
5903				1	5
5904				1	5
5905				1	5
5906				0	5
5907				1	5
5908	F				3	4	4	4	4	4	3	4	3	3	3	5
5931			1	5
5932			1	5
5935				0	5
5938				0	5
6014				0	5
6015					3	5
6016	M				3	4	4	4	4	4	3	3	3	3	3	3	5
6023	F				3	5
6024	M				3	4	4	4	4	3	3	3	3	3	3	3	3	3	3	3	3	3	5
6025	F				3	4	4	4	4	3	3	3	5
6026				0	5
6036	F										3	3	3	3	3	3	4	4	3	5
6037				0	5
1214			3	3	5
2179				3	3	3	5
2181	M				1	2	2	2	2	3	3	3	3	3	3	3	3	3	5
2188	m				0	5
2359	F				3	5
2392					1	2	3	3	3	5
2402					0	5
2404					1	5
2615					3	5
2784				1	5
2789				1	5
3050				1	5
3881					0	5
3900				3	5
3952					0	5
3977			3	3	3	5
3978				3	5
3986				3	5
3988				3	3	3	5
4009			3	3	3	5
4011				3	3	3	3	3	3	4	3	3	3	3	3	3	4	4	3	3	5
4016			3	3	3	3	3	3	3	5
4021			3	3	3	3	3	3	3	5
4025			3	3	3	4	4	4	4	4	3	5
4049	M			3	3	4	3	3	4	3	4	4	3	5
4070	F		3	3	3	3	3	5
4089	F			3	3	3	5
4093			3	3	5
4097			3	3	3	5
4143			3	3	4	3	3	3	3	5
4162	F			3	5
4166				3	3	5
5727				1	5
5737					0	5
5754	M				3	4	4	4	4	3	3	3	3	4	4	3	5
5755					3	5
5756	M				3	3	4	4	4	3	5
5757	F				3	3	3	5
5758				1	5
5759					3	5
5764					0	5
5765	F				3	3	5
5945				1	5
5946				1	3	5
5955				1	5
5956				1	5
5957				1	5
5958	F				3	3	3	3	3	4	3	3	5
5959	M			1	5
5960					0	5
5971	F									3	3	3	3	3	3	3	3	4	3	3	3	5
5972				1	5
5973					0	5
5978											3	3	3	3	5
5982				1	5
5996				1	5
5998				1	5
6047				1	5
6071					0	5
6074	F				0	5
6089				1	5
6090				1	5
6091					0	5
8101					1	5
8102					1	5
8103					1	5
8104					1	5
8105					1	5
8106					1	5
8107					1	5
8108					1	5
8109					1	5
8110					1	5
8111					1	5
8112					1	5
8113					1	5
8114					1	5
8115					1	5
8116					1	5
8117					1	5
8118					1	5
8126				1	5
8127					0	5
8201					1	5
8202					1	5
8203					1	5
8204					1	5
8205					1	5
8206					1	5
8207					1	5
8208					1	5
8209					1	5
8210					1	5
8211					1	5
8212					1	5
8213					1	5
8214					1	5
8215					1	5
8216					1	5
8217					1	5
8218					1	5
8219					1	5
8220					1	5
8221					1	5
8222					1	5
8223					1	5
8224					1	5
8225					1	5
8226					1	5
8227					1	5
8228					1	5
8229					1	5
8230					1	5
8231					1	5
8232					1	5
8233					1	5
8234					1	5
8238					1	5
8239					1	5
8240					1	5
8241					1	5
8242					1	5
8243					1	5
8244					1	5
8245					1	5
8246					1	5
8262					1	5
8263					1	5
8264					1	5
8265					1	5
8266					1	5
8267					1	5
8268					1	5
8269					1	5
8270					1	5
8271					1	5
8272					1	5
8273					1	5
8274					1	5
8275					1	5
8276					1	5
8277					1	5
8278					1	5
8279					1	5
8280					1	5
8281					1	5
8282					1	5
8283					1	5
8284					1	5
8285					1	5
8286					1	5
8287					1	5
8288					1	5
8289					1	5
8290					1	5
8291					1	5
8292					1	5
8293					1	5
8294					1	5
8295					1	5
8296					1	5
8297					1	5
8298					1	5
8299					1	5
8300					1	5
8301					1	5
8302					1	5
8303					1	5
8304					1	5
8305					1	5
8306					1	5
8307					1	5
8308					1	5
8309					1	5
8310					1	5
8311					1	5
8312					1	5
8313					1	5
8314					1	5
8315					1	5
8316					1	5
8317					1	5
8318					1	5
8319					1	5
8320					1	5
8321					1	5
8322					1	5
8323					1	5
8324					1	5
8325					1	5
8326					1	5
8327					1	5
8328					1	5
8329					1	5
8330					1	5
8331					1	5
8332					1	5
8333					1	5
8334					1	5
8335					1	5
8336					1	5
8337					1	5
8338					1	5
8339					1	5
8340					1	5
8341					1	5
8342					1	5
8343					1	5
8344					1	5
8345					1	5
8346					1	5
8347					1	5
8348					1	5
8349					1	5
8350					1	5
8442					1	5
8443					1	5
8444					1	5
8445					1	5
8446					1	5
8522					0	5
8527				1	5
8536					0	5
8547				1	5
2199						1	5
3993	M		3	3	3	3	4	3	3	5
3994			3	3	3	3	3	3	5
4013	M		3	3	3	3	3	3	3	4	3	3	5
4034				3	5
4059	M		3	3	3	3	3	3	5
4073	M		3	3	5
4080	M		3	3	3	4	4	3	3	5
4108			3	3	3	5
4156			3	3	3	3	3	3	5
4165	F			3	3	3	4	3	3	5
5692						0	5
5696	M					3	4	4	3	5
5697						0	5
5748						0	5
8448						0	5
8559						0	5
8560					1	5
8563						1	5
8564						1	5
8565						1	5
8581						1	5
8582						1	5
8583						1	5
8584						1	5
8585						0	5
8586						1	5
8587						1	5
8588						0	5
8589						0	5
8590						1	5
8591						1	5
8592						1	5
8593						1	5
8594						1	5
8595						1	5
8596						1	5
8597						1	5
8598						1	5
8599						1	5
8600						1	2	2	2	2	3	3	3	3	3	5
8651						1	2	2	3	5
8652						1	5
8653						1	2	3	3	5
8654						1	5
8671					1	5
8672						0	5
8673						0	5
8674						0	5
8675						0	5
8881						1	5
8882						1	5
8883						1	5
8884						1	5
8885						1	5
8900						1	5
3872	F			3	3	3	3	3	3	5
3950	M						0	5
4003	M	3	3	3	3	3	3	3	3	5
4022	F		3	3	3	3	3	3	3	5
4033			3	3	5
4048			3	3	3	3	3	3	3	5
4104	M		3	3	4	4	4	4	4	4	4	4	4	3	3	3	3	5
4106			3	3	3	3	3	3	3	5
4834							1	5
4843							0	5
8611							0	5
8612						1	5
8681							0	5
8682	f						3	3	3	5
8683							0	5
8901							0	5
8902							0	5
8903							0	5
8904							0	5
9401							0	5
9408						1	5
9740							1	5
9741							1	2	2	2	2	2	2	2	3	5
9742							1	2	2	2	2	2	2	2	3	5
9743							1	5
9744							1	5
9745							1	5
9746							1	5
9747							1	5
9748							1	5
9749	M						1	2	2	2	2	3	3	3	3	5
9750	M						1	2	2	2	3	4	4	4	3	3	5
9754							1	5
9755							1	5
9757							1	5
9784							1	5
9785							1	5
9786	M						1	2	2	2	2	3	4	3	3	3	4	3	3	3	3	3	3	3	3	3	5
9787							1	5
9788	M						1	2	2	2	3	3	3	3	3	3	5
9789							1	5
9801							1	5
9802							1	5
9803							1	5
9804							1	5
9806							1	5
9807							1	5
9808							1	5
9809							1	5
9810							1	2	3	5
9811	F						1	5
9813							1	5
9814							1	5
9815							1	5
9816							1	5
9817							1	5
9818							1	5
9819							1	5
9820							1	5
9821							1	2	2	2	2	2	3	3	3	3	5
9822							1	2	2	2	3	3	3	3	3	3	3	5
9823	F						1	2	2	2	3	3	3	3	3	3	3	3	3	5
9824							1	5
9825							1	5
9826							1	5
9827	F						1	2	2	2	3	5
9828							1	2	2	2	2	2	2	2	2	2	2	2	2	2	3	5
9829							1	5
9830							1	5
9831							1	5
9832							1	5
9833							1	5
9834							1	5
9835							1	5
9836							1	5
9837							1	5
9838							1	2	2	2	2	2	3	3	3	3	5
9839							1	5
9840							1	5
9841							1	5
9842							1	2	2	2	2	2	2	3	5
9843							1	5
9844	F						1	2	2	2	3	3	3	3	3	3	3	3	3	4	3	3	4	4	3	3	5
9845							1	5
9846							1	2	3	4	3	3	5
9847	M						1	2	2	3	4	4	3	4	4	3	5
9848							1	5
9849							1	5
9850							1	5
9851							1	5
9852	F						1	2	2	2	3	3	3	3	3	3	3	3	3	5
9853							1	5
9854							1	5
9872							1	2	2	2	2	3	3	3	3	3	3	3	3	3	5
9873							1	2	2	2	3	3	3	3	3	3	5
2224	F							1	2	3	3	3	4	3	5
2248	M						3
4087			3	3	4	3	3	4	3	3	3	3	3	3	3	3	3	3	3	4	4	4	4	3	5
4103	F		3	3	3	3	4	3	3	5
5781								1	5
5782								1	5
5783								1	5
5784								1	5
5785								1	5
5786								1	5
5787	F							1	5
5788								1	5
5789								1	5
5790								1	5
5791								1	5
5792								1	2	2	3	4	3	3	3	3	3	5
5793								1	5
5794								1	5
5795								1	5
5796								1	5
5797								1	5
5798								1	5
5799								1	5
5800								1	5
9758								1	5
9759								1	5
9760								1	5
9790								1	5
9874							1	5
9875							1	5
9877								0	5
9881								3	3	5
9882							1	2	2	2	3	3	4	3	5
9885	F						1	2	2	2	2	2	3	3	3	3	3	3	3	3	3	4	3	3	3	3	5
9886									3	3	3	3	3	3	3	3	3	3	3	5
9887	F										3	3	3	3	3	3	5
9888							1	5
9896							1	5
9897										3	3	3	3	3	3	3	3	5
9914								3	3	3	3	3	3	3	3	3	3	4	4	3	4	3	5
9916								0	5
9917							1	5
9918	F							0	5
9919								1	5
9920								1	5
10054								1	2	2	2	3	3	3	3	3	3	3	4	3	3	5
10055								1	5
10056								1	5
10057								1	5
10058								1	5
10059								1	5
10060								1	5
10061								1	2	2	3	3	3	3	3	3	4	3	5
10062								1	5
10063								1	5
10064								1	5
10065								1	2	2	3	4	4	3	3	3	5
10066								1	2	2	2	2	3	3	3	3	5
10067								1	5
10068								1	2	2	2	2	2	3	3	3	5
10069								1	2	2	2	2	2	2	2	2	3	3	5
10070								1	5
10071								1	5
10072								1	5
10073								1	5
10074								1	5
10075								1	5
10076								1	2	2	2	2	3	3	3	3	3	3	3	4	3	3	4	4	3	3	3	5
10077								1	5
10078								1	5
10079								1	2	2	3	3	3	3	3	3	3	3	5
10080								1	5
10081								1	5
10082								1	5
10083								1	5
10084								1	2	2	2	2	2	2	3	4	3	4	3	3	4	3	3	3	3	3	3	3	5
10085								1	2	2	2	3	5
10086								1	5
10087								1	5
10088								1	5
10089								1	5
10090								1	5
10091								1	5
10092								1	5
10093								1	2	2	3	3	3	3	3	5
10094								1	2	2	3	3	3	3	3	3	3	5
10095								1	5
10096								1	5
10097								1	5
10098								1	5
10099								1	2	2	2	2	2	3	3	3	3	3	5
10100								1	2	2	3	4	3	3	4	3	3	4	3	4	4	4	4	4	3	5
10101								1	5
10102								1	5
10103								1	5
10104								1	5
10105								1	5
10106								1	5
10107								1	5
10108								1	5
10109								1	5
10110								1	5
10111								1	2	2	3	3	5
10112								1	5
10113								1	5
10114								1	2	3	4	4	3	3	3	3	4	3	3	3	3	5
10115								1	5
10201								1	5
10202	F							1	2	2	3	3	3	3	3	3	3	3	3	5
10203								1	2	2	2	3	3	3	5
10204								1	5
10205								1	5
10206								1	5
10207								1	5
10208								1	5
10209								1	2	2	3	3	3	3	3	3	3	3	3	3	3	3	4	3	3	3	5
10210								1	5
10211								1	5
10212								1	2	2	2	2	2	3	4	4	4	4	4	4	4	4	4	4	3	5
10213	F							1	2	2	3	3	3	3	3	3	3	3	3	3	3	3	3	3	3	3	4	4	3	5
10214	F							1	2	2	3	3	3	3	3	3	3	3	3	3	3	3	3	4	3	3	3	5
10215								1	5
10216								1	5
10217								1	2	2	2	2	2	2	2	2	3	3	3	3	3	3	5
10218								1	2	2	2	2	3	3	3	3	3	3	3	5
10219								1	5
2378									1	5
4100			3	3	5
10028								1	5
10143	M							1	2	2	2	2	3	3	3	3	3	3	3	3	3	3	5
10146	F										3	4	4	3	3	3	5
10147									3	5
10148									0	5
10149								1	5
10150								1	5
10151	M										3	3	3	3	3	3	3	3	3	3	3	5
10152								1	5
10153								1	5
10154	F								0	5
10155									3	5
10156	F							1	2	2	2	3	3	3	3	4	3	4	3	5
10159									1	5
10160									1	5
10162								1	5
10163								1	2	2	2	3	3	3	3	3	3	3	3	3	3	3	3	3	3	5
10164									0	5
10165								1	5
10166								1	2	2	2	2	3	3	3	3	4	4	3	3	3	4	3	4	4	3	5
10168								1	5
10169											3	5
10181									1	5
10182									1	5
10183	M									3	3	3	3	5
10184									1	5
10185									1	5
10186									1	5
10187									1	2	2	2	3	3	3	3	3	3	3	4	3	3	5
10188	F									3	3	3	3	3	3	5
10189									1	5
10190									1	5
10191									1	5
10192									1	5
10193									1	5
10194									1	5
10195									1	5
10196									1	5
10197									1	5
10198									1	5
10199									1	5
10200									1	5
10351									1	5
10352									1	5
10353									1	5
10354									1	5
10355									1	2	2	2	2	2	2	2	2	2	2	2	3	5
10356									1	5
10357									1	5
10358									1	5
10359									1	5
10360									1	5
10361									1	5
10362									1	5
10363									1	5
10364									1	5
10365									1	5
10366									1	5
10367									1	5
10368									1	5
10369									1	5
10370									1	5
10371									1	5
10372									1	5
10373									1	5
10374									1	5
10375									1	5
10376									1	5
10377									1	5
10378									1	5
10379									1	5
10381									1	5
10382									1	5
10383									1	5
10384									1	5
10391									1	5
10392									1	5
10393									1	2	2	3	5
10394									1	5
10395									1	5
10396									1	5
10397									1	5
10398									1	5
10399									1	5
10400									1	5
10429									1	5
10432									1	5
10433									1	5
10444								1	5
10535									0	5
10570								1	2	2	2	3	3	4	3	5
10571								1	5
3880	M			3	4	4	4	4	4	4	4	4	3	3	3	4	3	3	3	3	5
3976			3	4	4	4	4	4	4	3	4	3	3	3	3	5
4127			3	4	3	4	4	4	4	4	4	4	4	3	3	3	5
9348										1	5
9350													3	3	3	3	5
10177										3	5
10544										3	3	3	3	3	5
10546	M									3	3	5
10548	M									3	3	3	3	3	3	3	5
10549	F									3	3	3	3	3	5
10550	F									3	4	3	3	3	3	3	3	3	3	3	5
11113										1	5
11114									1	5
11115										1	5
11116										1	5
11117										1	5
11118										1	5
11119										1	5
11120										1	5
11151										1	5
11152										1	5
11153										1	5
11154										1	2	2	3	3	3	5
11155										1	5
11156										1	5
11157										1	5
11158										1	5
11159										1	5
11160										1	5
11161										1	5
11162										1	5
11163										1	5
11164										1	5
11165										1	5
11166										1	5
11167										1	5
11168										1	5
11169										1	5
11361											3	5
11136	M										3	3	3	3	3	3	3	3	3	5
11137	F										3	3	3	3	3	3	3	3	3	3	3	5
11138											1	5
11139											1	5
11140											1	5
11194											3	5
11195												3	3	3	3	5
11197											3	3	3	3	3	3	3	3	5
11198															3	5
11202											1	5
11203											1	5
11204											1	5
11205											1	2	2	3	3	3	3	3	3	3	3	3	3	3	3	3	3	3	5
11206											1	2	2	2	2	2	3	5
11207											1	5
11208											1	5
11209											1	5
11211											1	5
11212											1	5
11213											1	5
11214											1	5
11215											1	5
11216											1	5
11217											1	5
11218											1	5
11219											1	2	2	2	3	3	5
11220											1	5
11221											1	5
11222											1	5
11223											1	2	2	2	3	5
11224											1	5
11225											1	5
11226											1	5
11227											1	2	3	3	3	3	5
11228											1	2	2	3	3	3	3	5
11229											1	5
11250											1	5
11351											3	3	3	3	3	3	5
11352											3	3	3	3	3	3	4	3	3	3	3	4	3	4	3	3	3	4	3	3	4	3	3
11353											3	3	3	3	3	3	3	3	3	3	3	5
11356											3	3	5
11357										1	5
11458											1	5
11459											1	5
11460											1	5
11461											1	5
11462											1	5
11463											1	5
11464											1	2	3	3	3	3	3	3	3	3	3	4	3	3	3	4	4	4	4	3	3	3	5
11465											1	5
11466											1	2	3	3	3	3	5
11467											1	5
11468											1	5
11469											1	5
11470											1	5
11471											1	5
11472											1	5
11473											1	5
11474											1	5
11475											1	5
11476											1	5
11477											1	5
11478											1	5
11479											1	5
11480											1	5
11481											1	5
11482											1	2	2	2	3	4	4	3	4	3	3	3	3	5
11483											1	5
11484											1	5
11485											1	5
11486											1	5
11487											1	5
11488											1	5
11489											1	5
11490											1	5
11497											1	5
11498												3	3	5
11499											1	5
11651											1	5
11652											1	2	2	3	3	3	3	3	3	3	3	4	3	3	3	3	5
11653											1	5
11654											1	5
11655											1	5
11656											1	5
11657											1	5
11658											1	5
11659											1	2	3	4	3	3	3	3	3	3	3	5
11660											1	5
1081			3	3	3	3	4	4	4	3	3	3	3	3	3	3	3	5
1550	m		3	3	3	3	3	3	3	4	4	3	3	3	3	3	3	3	3	5
2165	M			3	3	3	4	4	4	4	4	3	3	3	3	3	3	3	3	3	5
2370											3	3	3	3	3	3	3	4	3	3	5
2464												3	5
2719												0	5
3851								3	4	4	3	3	3	3	3	3	3	3	5
3877											3	3	3	3	3	3	4	4	4	4	3	3	4	3	5
3882	F			3	3	3	3	3	3	3	3	3	3	3	3	3	5
3980	F	3	3	3	3	3	3	3	3	3	3	3	3	3	3	3	5
3984					3	4	4	4	4	4	4	3	3	3	3	3	3	4	4	4	4	3	5
3995	m		3	3	3	4	4	4	4	3	3	3	3	3	3	3	3	4	3	3	5
3997	M		3	3	4	4	4	4	4	3	3	3	3	3	3	3	5
4004		3	3	3	3	3	3	3	3	3	3	3	3	4	3	3	5
4006			3	3	4	4	4	4	4	4	4	3	3	3	3	3	3	3	3	3	5
4008	M		3	3	3	3	4	4	4	4	3	3	3	3	3	4	3	5
4058	M		3	3	3	3	4	4	4	4	3	3	3	3	3	4	3	5
4064			3	3	3	3	3	4	4	4	3	3	3	3	4	3	4	3	5
4066	F		3	3	4	4	4	4	4	3	3	3	3	3	3	3	3	4	4	3	3	5
4071			3	3	3	3	3	3	3	4	3	3	3	3	3	3	5
4083											3	3	3	4	3	3	3	4	3	5
4086	M		3	3	3	3	4	4	4	4	3	3	5
4088	F		3	3	3	3	3	3	3	3	3	3	3	3	3	3	3	3	5
4090			3	3	4	3	3	3	3	4	3	3	4	4	3	3	3	5
4098	F		3	3	3	3	4	4	4	4	3	3	3	3	5
4109			3	3	3	3	3	3	3	3	3	3	3	3	3	3	3	5
4110	M		3	3	3	3	3	3	3	3	3	3	3	3	3	3	3	5
4124				3	4	3	3	3	4	4	3	3	3	3	3	3	3	3	5
4135			3	3	3	3	3	3	3	4	3	3	3	3	3	3	5
4141											3	3	3	3	3	3	3	3	3	3	3	5
4185	M						3	3	3	3	3	3	3	3	5
9857											3	3	3	3	3	5
9930												3	3	3	3	3	5
9932											3	3	3	5
11401											1	2	3	3	3	3	5
11402													3	3	3	3	3	3	5
11403												3	5
11404												3	3	3	3	3	5
11405												3	3	3	3	3	5
11410											1	2	3	3	3	3	5
11421													3	3	3	3	3	4	3	3	3	5
11501												3	3	3	3	3	5
11831												1	5
11832												1	5
11833												1	2	2	2	3	5
11834												1	5
11835												1	5
11836												1	5
11837												1	5
11838												1	5
11839												1	5
11840												1	5
11844												1	5
11845												1	2	3	3	3	3	3	5
11846												1	2	2	3	3	5
11847												1	2	2	3	3	3	5
11848												1	2	2	3	4	3	3	3	3	3	3	3	3	3	3	3	3	3	4	3	3	3
11849												1	2	2	3	3	3	5
11850												1	5
13051												1	5
13052												1	5
13053												1	5
13054												1	5
13055												1	5
13056												1	5
13057												1	2	2	3	3	3	3	3	3	3	3	3	3	3	3	4	4	3	3	4	3	5
13058												1	2	2	3	4	3	3	3	3	3	5
13059												1	5
13060												1	2	2	3	5
13061												1	2	2	3	3	3	4	3	3	3	4	3	5
13062												1	2	2	3	3	3	5
13063												1	5
13064												1	5
13065												1	2	2	3	3	3	3	3	3	3	3	3	3	3	3	3	3	5
13066												1	2	2	3	3	5
13067												1	5
13068												1	2	2	3	3	3	5
13069												1	5
13070												1	5
13071												1	5
13072												1	2	2	3	3	3	3	3	5
13073												1	5
13074												1	5
13075												1	2	2	3	3	3	4	3	3	3	3	3	4	4	3	5
13076												1	5
13077												1	5
13078												1	5
13079												1	2	2	3	3	5
13080												1	5
13081												1	2	2	2	3	3	3	3	3	3	3	3	3	3	3	3	3	3	3	3	3	3
13082												1	2	2	2	3	3	3	3	5
13083	F											1	5
13084												1	2	2	2	3	3	3	3	3	3	5
13085												1	5
13247												1	5
13248												1	5
13249												1	5
13250												1	5
13251												1	2	2	2	2	2	2	2	2	2	2	2	3	5
13252												1	5
13253												1	5
13254												1	5
13255												1	2	2	3	3	3	3	3	3	4	4	4	4	3	3	3	3	5
13256												1	5
13257												1	5
13258												1	2	2	3	3	3	3	3	5
13259												1	2	2	3	3	5
13260												1	2	2	3	3	3	5
13261												1	2	2	2	3	3	3	3	3	3	4	3	4	3	4	3	3	5
13262												1	5
13263												1	2	2	3	3	4	3	4	3	5
13264												1	5
13265												1	5
13266												1	2	2	2	2	3	5
13267												1	2	2	3	5
13268												1	5
13269												1	5
13270												1	5
13271												1	2	2	3	3	3	5
13272												1	2	2	3	3	3	4	3	3	3	4	3	4	3	3	5
13273												1	2	2	3	3	3	4	3	3	3	3	3	3	3	5
13274												1	5
13275												1	5
13276												1	2	2	3	3	5
13277												1	5
13377											1	2	2	2	2	3	3	5
1121	m	4	3	3	3	3	3	3	3	4	3	4	4	3	3	5
2177				3	3	4	3	3	3	3	4	4	3	3	3	3	3	3	5
2247										3	3	3	3	3	3	3	5
2281	M		1	2	2	2	2	2	2	3	3	4	3	3	3	3	3	5
2395				1	2	3	4	4	3	4	3	4	3	3	3	3	4	4	4	4	3	3	4	3	5
2419		1	2	2	2	3	4	4	3	4	3	4	3	3	5
2449													3	3	3	3	4	4	3	3	3	5
3878										3	4	3	3	3	3	4	3	5
11422	m											1	2	2	2	3	5
11423													3	3	5
11425														3	3	4	3	3	4	3	5
11426	m												3	3	5
11680													3	5
11695													3	3	3	3	3	3	3	4	3	5
11698													3	5
12246	m												3	3	3	3	3	3	3	3	3	5
12247	m												3	3	3	3	5
12251	f												1	2	2	3	3	3	3	3	3	3	5
12252	f												1	2	3	3	3	3	3	3	3	3	5
12253	f												1	5
12254	m												1	5
12255	m												1	5
12256	f												1	2	2	2	2	2	3	5
12257	f												1	2	2	3	3	4	3	3	3	3	3	3	3	3	4	3	5
12258	m												1	5
12259	m												1	2	2	3	3	3	3	3	3	3	3	3	3	3	4	3	3	5
12260	m												1	2	2	3	4	3	5
12261	m												1	5
12262	m												1	5
12263	f												1	5
12264	f												1	2	2	3	3	4	3	3	3	3	4	3	3	5
12265	f												1	2	2	3	3	3	3	3	5
12266	f												1	2	2	3	5
12267	f												1	2	2	3	3	3	3	3	3	5
12268	f												1	5
12269	f												1	2	2	3	5
12270	f												1	2	2	3	5
12271	f												1	2	2	3	3	3	3	3	3	3	5
12272	m												1	5
12273	m												1	2	2	3	3	3	3	3	5
12274	f												1	2	2	3	5
12275	f												1	2	3	3	3	3	4	4	3	4	3	4	3	3	3	3	3	4	3	3	3
12276	f												1	2	2	3	3	3	3	3	3	3	5
12277	f												1	2	2	3	3	3	3	3	3	5
12278	m												1	2	2	3	3	3	4	3	3	4	3	3	3	3	5
12279	m												1	2	3	3	3	3	3	3	5
12280	m												1	5
12281	m												1	2	2	3	3	3	3	3	3	3	3	3	4	3	3	4	3	3	3	3	3	3	3
12294													1	5
12351													1	2	3	3	3	5
12353													1	5
12354													1	5
12355													1	5
12356													1	2	2	3	3	3	3	5
12357													1	5
12358													1	5
12359													1	5
12360													1	5
12361													1	5
12362													1	5
12363													1	5
12364													1	2	3	3	3	5
12365													1	2	2	3	3	3	3	3	5
12366													1	2	2	3	3	3	3	3	3	3	3	3	3	5
12367													1	5
12368													1	5
12369													1	5
12370													1	5
12461													1	2	2	3	3	3	3	3	3	3	5
12462													1	2	2	3	5
12463													1	5
12464													1	5
12465													1	5
12466													1	2	2	3	3	3	3	4	3	3	3	3	3	5
12467													1	5
12468													1	2	2	3	3	3	3	5
12469													1	5
12470													1	5
12471													1	5
12472													1	5
12473													1	2	3	3	4	3	3	3	3	3	5
12474													1	2	2	3	3	4	3	3	4	3	3	3	3	3	3	3	5
12475													1	2	2	3	5
12476													1	2	2	3	5
12477													1	2	2	3	3	3	3	3	3	5
12478													1	2	2	3	5
12479													1	5
12480													1	5
12481													1	2	2	3	5
12482													1	5
12483													1	2	3	3	3	3	3	3	3	5
12484													1	5
12485													1	2	3	3	3	5
12486													1	2	2	3	3	5
12487													1	2	2	3	5
12488													1	5
12489													1	2	2	2	3	3	3	3	3	3	3	3	4	4	4	3	4	4	3	3	4	4	3
12490													1	5
12491													1	2	2	3	3	3	3	3	3	5
12494													1	5
12495													1	2	2	3	4	4	3	3	3	3	3	3	3	3	3	3	3	3	4	3	5
12496													1	5
12497													1	5
12498													1	2	3	5
12499													1	2	2	3	3	5
12500													1	5
13292												1	5
13293												1	2	2	2	2	2	2	2	2	2	2	2	2	2	2	2	2	2	3	5
13299	m													3	3	3	3	4	3	5
13378												1	2	2	2	2	3	3	3	5
14028	F														3	5
3982	F		3	3	3	3	3	4	4	4	3	3	3	3	4	3	3	3	3	3	3	5
4144				3	4	4	3	3	3	3	3	4	3	3	3	3	5
4152			3	3	3	3	3	3	3	4	4	4	3	3	3	3	5
11699													1	2	2	3	3	3	3	4	3	3	3	3	5
11821															3	3	3	3	3	3	3	5
12546													1	5
12548														3	3	3	3	3	3	5
12549														3	3	3	3	3	5
13127														0	5
13129														3	3	3	3	3	3	3	3	3	3	3	3	5
13135	m													3	3	3	3	3	5
13151														1	5
13152														1	5
13153														1	5
13154														1	5
13155														1	2	3	4	3	5
13156														1	2	3	3	5
13157														1	2	3	3	5
13158														1	5
13159														1	5
13160														1	5
13170														1	2	2	2	3	5
13171														1	5
13172														1	2	3	3	3	5
13173														1	5
13174														1	2	2	3	4	3	5
13175														1	5
13176														1	2	3	3	4	3	3	3	3	5
13177														1	5
13178														1	5
13179														1	2	2	3	3	3	3	3	5
13180														1	2	2	2	3	5
13181														1	5
13182														1	5
13183																3	3	4	4	4	3	5
13184														1	2	2	2	3	3	3	3	3	3	3	5
13185														1	2	2	2	2	2	3	4	3	5
13186														1	2	3	5
13187														1	5
13188														1	2	3	5
13189														0	5
13190														1	5
13191														1	2	3	5
13192														1	5
13193														1	5
13194														1	5
13195														1	5
13196														1	5
13197														1	5
13198														1	5
13199														1	5
13200														1	2	2	2	2	2	3	3	3	5
13921														1	2	2	3	5
13922														1	5
13923														1	2	3	3	3	3	3	3	3	3	3	4	3	3	3	5
13924														1	5
13925														1	5
13926														1	5
13927														1	5
13928														1	2	2	3	3	3	3	3	5
13929														1	2	2	3	5
13930														1	2	3	3	3	4	3	3	5
13931														1	5
13932														1	5
13933														1	5
13934														1	2	3	5
13935														1	5
13948	f													1	5
13949	f													1	5
13950	m													1	2	2	3	5
13951	f													1	2	2	2	3	3	3	3	4	3	5
13952	f													1	5
13953	m													1	5
13954	m													1	2	2	2	2	3	3	4	4	4	4	3	3	4	3	3	4	4	4	3	5
13955	m													1	2	2	3	5
13956	m													1	2	2	3	3	3	3	3	4	4	4	3	5
13957	f													1	5
13958	f													1	2	2	3	5
13959	f													1	5
13960	f													1	2	2	2	3	5
13961	f													1	2	2	2	2	2	2	2	2	2	2	2	3	5
13962	f													1	2	3	5
13963	f													1	2	3	3	4	3	3	4	4	4	3	3	3	3	5
13964	f													1	2	3	4	4	4	4	4	4	3	5
13965	f													1	5
13966	f													1	5
13967	m													1	5
13968	f													1	5
13969	f													1	5
13970	m													1	5
13971	m													1	2	2	3	5
13972	m													1	2	2	2	2	2	2	2	2	2	2	2	2	2	3	5
13973	m													1	5
13974	f													1	5
13975	f													1	2	3	3	3	3	3	3	3	3	3	4	4	3	4	3	3	3	3	5
13976	f													1	2	2	3	5
13977	f													1	5
13978	m													1	2	2	3	5
13979	f													1	5
13980	m													1	5
13981	f													1	2	2	2	2	2	3	3	3	3	4	3	3	5
13982	f													1	5
13983	m													1	2	2	3	5
13984	f													1	2	2	3	4	3	4	4	4	3	3	3	3	3	3	3	3	4	3	5
13985	f													1	5
13986	f													1	2	3	3	3	3	3	3	5
13987	f													1	5
13988	f													1	5
13989														1	2	2	3	5
13990	m													1	2	3	4	4	3	3	3	3	3	3	5
13991	f													1	2	2	3	4	3	5
13999														1	5
14000														1	2	3	5
2138		1	2	3	3	3	3	3	3	5
2365									3	3	4	3	4	4	3	3	3	3	3	5
2366									3	3	4	3	4	4	3	3	3	3	5
12493																3	3	3	3	3	5
14031															1	5
14032															1	2	2	2	3	5
14033															1	5
14034															1	5
14035															1	5
14036															1	2	2	3	4	3	3	4	3	3	4	3	3	3	3	5
14037															1	2	2	2	3	3	3	3	3	3	3	3	4	4	4	4	4	3	3	3
14038															1	2	3	3	3	3	3	5
14039															1	5
14040															1	5
14041															1	2	2	2	3	3	3	3	3	3	3	3	3	3	3	3	3	4	3	3
14042															1	5
14043															1	2	3	5
14044															1	5
14045															1	5
14046															1	5
14047															1	5
14048															1	5
14049															1	2	2	3	5
14050															1	2	2	3	3	3	3	3	5
14099	m														3	5
14100															3	3	3	4	3	3	5
14306															1	5
14307															1	2	2	2	3	5
14309															1	2	2	2	3	5
14310															1	2	2	3	3	3	5
14311	f														1	2	3	4	3	3	4	3	3	3	3	3	3	4	3	3	3	4	3
14312															1	5
14313															1	5
14314															1	5
14315															1	2	2	2	3	3	3	3	3	3	3	3	5
14316															1	5
14317															1	5
14318	f														1	5
14319															1	5
14320															1	5
14321	f														1	5
14322															1	5
14323															1	5
14324															1	5
14325															1	5
14326															1	5
14327															1	5
14328															1	2	3	4	3	3	3	5
14329															1	5
14330															1	5
14331															1	5
14332															1	5
14333															1	5
14334															1	2	2	2	3	3	3	3	5
14335	m														1	2	3	4	4	3	5
14336															1	2	2	3	3	3	3	5
14337															1	5
14338	m														1	2	2	3	5
14339															1	5
14340															1	5
14341															1	5
14342															1	5
14343															1	2	2	3	4	3	3	5
14344															1	5
14345															1	5
14346															1	2	2	2	2	2	3	3	5
14347															1	5
14348															1	5
14349															1	5
14350															1	5
14432	f														1	2	2	2	2	3	3	5
14433															1	2	2	3	3	4	3	3	3	3	3	3	3	3	3	5
14434															1	5
14462															1	5
14465															1	5
14466															1	5
14467															1	2	2	3	5
14468															1	5
14469															1	5
14470															1	2	2	2	3	3	3	3	3	3	3	4	3	4	3	3	3	4	3
14471															1	2	2	2	2	2	2	2	2	2	2	3	5
14472															1	5
14473															1	5
14474															1	2	2	3	4	4	3	5
14475															1	5
14476															1	5
14477															1	5
14478															1	5
14479															1	2	2	3	3	3	3	5
14480															1	5
14481															1	2	2	2	2	2	2	2	2	2	2	2	2	2	2	3	5
14482															1	5
14483															1	2	2	3	3	4	4	4	4	4	3	5
14601															1	5
14602															1	5
14603	f														1	2	2	2	3	3	3	3	5
14604															1	2	2	2	2	3	4	3	3	5
14605															1	5
14606															1	5
14607															1	5
14608															1	5
14609															1	5
14610															1	5
14611															1	5
14612	f														1	5
14613															1	5
14614	f														1	2	2	2	3	3	3	3	4	4	3	4	3	5
14615															1	5
14616															1	2	2	3	3	3	3	3	3	3	3	5
14617															1	5
14618															1	5
14619															1	2	2	3	5
14620	m														1	2	2	2	2	2	3	5
14621															1	2	3	4	3	3	3	3	3	5
14622															1	2	2	3	5
14623															1	2	2	3	3	4	3	5
14624															1	5
14625															1	5
14626															1	2	2	3	5
14627															1	5
14628															1	5
14629															1	5
14630															1	5
14631															1	2	2	2	3	5
14632															1	5
14633															1	5
14634															1	5
14635															1	5
14636															1	5
14637															1	2	2	2	2	3	5
11827															1	5
11828															1	5
14584																3	4	3	5
14585																	3	3	4	4	3	5
14586																3	3	3	3	3	3	3	4	3	3	4	3	3	5
14587																3	3	4	3	3	3	5
14588																3	3	3	3	4	3	3	3	5
14590																3	5
14641															1	5
14642															1	5
14643																3	4	4	3	3	3	3	3	3	3	4	3	3	3	4	4	3	3
14644																3	5
14645																3	5
14646																3	3	5
14647																3	3	4	4	4	4	3	3	3	3	3	5
14664																1	5
14665																1	2	2	3	5
14681																1	5
14682																1	5
14683																1	5
14684																1	5
14685																1	5
14686																1	5
14687																1	2	2	2	3	3	3	3	3	3	3	3	3	3	3	3	5
14688																1	2	2	2	2	3	4	4	3	3	3	3	3	5
14689																1	5
14690																1	5
14691																1	5
14692																1	5
14693																1	5
14694																1	2	2	3	5
14695																1	2	2	2	2	3	3	3	3	3	3	3	3	3	3	3	3	3
14696																1	5
14697																1	5
14698																1	5
14699																1	2	2	3	3	3	4	3	3	3	4	4	4	4	4	4	3	4	3	3
14700																1	5
14801																1	5
14802																1	2	2	2	2	3	3	3	3	5
14803																1	2	2	2	2	2	2	2	3	3	4	4	3	3	3	5
14804																1	5
14805																1	5
14806																1	5
14807																1	5
14808																1	5
14809																1	5
14810																1	2	2	2	2	3	4	4	3	3	3	3	3	3	5
14811																1	5
14812																1	5
14813																1	5
14814																1	5
14815																1	5
14816																1	5
14817																1	5
14818																1	5
14819																1	5
14820																1	5
14821																1	5
14822																1	5
14823																1	2	2	3	5
14824																1	5
14825																1	5
14826																1	5
14827																1	5
14828																1	5
14829																1	2	2	3	5
14830																1	5
14831																1	5
14832																1	2	2	2	3	5
14833																1	5
14834																1	5
14835																1	5
14836																1	5
14837																1	5
14838																1	5
14839																1	2	2	3	3	5
14840																1	5
14841																1	2	2	3	3	3	5
14842																1	5
14843																1	5
14844																1	5
14845																1	5
14846																1	5
14847																1	5
14848																1	2	2	2	2	3	4	3	3	4	3	3	5
14849																1	5
14850																1	5
14951																1	5
14952																1	5
14953																1	5
14954																1	5
14955																1	5
14956																1	5
14957																1	5
14958																1	5
14959																1	5
14960																1	5
14961																1	2	2	3	3	4	4	3	5
14962																1	5
14963																1	2	2	2	3	3	3	3	4	3	3	3	3	3	3	3	3	3
14964																1	5
14965																1	5
14966																1	5
14967																1	5
14968																1	2	2	2	2	3	5
14969																1	2	2	2	3	3	4	3	5
14970																1	2	2	2	3	5
14971																1	5
14972																1	2	2	2	2	2	2	2	2	2	2	3	5
15089																1	5
15090																1	2	2	3	4	3	5
15091																1	5
15092																1	2	2	2	2	2	2	3	4	3	4	3	5
15093																1	5
15094																1	2	2	2	3	3	3	3	4	3	3	3	3	4	4	3	3	5
15095																1	2	2	3	4	3	4	3	5
15096																1	2	2	2	2	3	4	4	4	4	3	5
15097																1	2	2	3	3	4	3	3	3	3	4	3	3	5
15098																1	5
15099																1	5
15100																1	2	3	5
15501																1	5
15502																1	5
15503																1	2	2	2	2	3	4	3	3	3	5
15504																1	5
15506																1	2	2	3	5
15507																1	5
15508																1	5
15509																1	5
15510																1	5
15511																1	5
15512																1	5
15513																1	5
15514																1	2	2	2	2	3	5
15515																1	5
15516																1	5
15517																1	5
15518																1	2	2	2	2	3	5
15519																1	5
15520																1	5
15521																1	5
15522																1	5
15523																1	5
15524																1	5
15525																1	5
15526																1	5
15527																1	5
15528																1	5
15529																1	5
15530																1	5
15531																1	5
15532																1	5
15533																1	5
15534																1	5
15535																1	5
15536																1	5
15537																1	5
15538																1	5
15539																1	5
15540																1	5
15541																1	5
15542																1	5
15543																1	5
15544																1	2	2	3	5
15545																1	5
15546																1	5
15547																1	5
15548																1	5
15549																1	2	2	2	2	3	3	3	3	3	3	5
15550																1	5
15551																1	5
15552																1	2	2	2	2	3	3	5
15553																1	5
15554																1	2	2	3	3	3	5
15555																1	5
15556																1	2	2	3	3	3	5
15557																1	5
15642															1	5
15643																0	5
15804	f															1	5
14597																	3	5
14598																	3	5
15647	m																1	5
15648	f																1	2	2	3	3	3	4	4	3	3	4	3	3	4	3	3	3
15649	f																1	2	3	3	3	3	3	3	3	3	3	3	3	3	4	3	3
15650	m																1	5
15751	f																1	5
15752	m																1	2	3	3	3	3	3	4	3	3	3	3	3	3	3	3	5
15753	m																1	5
15754	m																1	5
15755	f																1	5
15756	m																1	5
15757	m																1	5
15758	f																1	5
15759	f																1	2	2	2	2	2	2	3	5
15760	f																1	5
15761	m																1	5
15762	f																1	5
15763	m																1	2	2	3	4	4	4	4	3	5
15764	m																1	5
15765	f																1	5
15766	m																1	5
15767	m																1	5
15768	m																1	5
15769	m																1	5
15770	m																1	2	2	3	4	3	4	4	3	4	4	3	4	4	3	5
15771	m																1	5
15772	f																1	5
15773	m																1	5
15774	m																1	5
15775	f																1	5
15776	m																1	5
15777	f																1	5
15778	m																1	5
15779	m																1	5
15780	m																1	5
15781	m																1	5
15782	f																1	5
15783	m																1	5
15784	m																1	5
15785	m																1	5
15786	m																1	5
15787	f																1	5
15788	m																1	2	2	2	2	3	4	4	4	3	3	3	4	3	3	3	3	3
15789	f																1	5
15790	m																1	5
15791	m																1	5
15792	f																1	5
15793	f																1	5
15794	f																1	5
15795	f																1	5
15796	m																1	5
15797	f																1	5
15798	f																1	5
15799	f																1	5
15800	m																1	2	2	3	3	4	4	3	4	3	3	3	3	3	3	3	3	3
15801	m																1	5
15802	f																1	5
15803	m																1	5
15805	f																1	5
15806	m																1	5
15807	m																1	5
15808	f																1	2	2	3	3	4	3	3	3	3	4	3	4	4	4	3	5
15809	m																1	2	2	2	3	5
15810	m																1	5
15811	m																1	5
15812	m																1	2	2	2	2	3	4	4	4	4	4	4	4	3	4	4	3
15813	m																1	2	2	2	3	3	3	5
15814	f																1	5
15815	m																1	2	2	3	5
15816	f																1	5
15817	f																1	2	2	2	3	3	3	3	5
15818	f																1	5
15819	m																1	2	2	3	3	3	3	4	3	5
15820	f																1	5
15821	m																1	5
15822	f																1	5
15873																	1	5
15874																	1	5
15875																	1	5
15876																	1	5
15877																	1	5
15878																	1	2	2	3	5
15879																	1	5
15880																	1	2	2	3	5
15965																	1	5
15966																	1	5
15967																	1	5
15968																	1	5
15969																	1	2	2	3	3	5
15970																	1	5
15971																	1	2	2	2	3	5
15972																	1	5
15973																	1	5
15974																	1	5
15975																	1	5
15976																	1	5
15977																	1	5
15978																	1	2	2	3	4	4	4	4	3	4	3	5
15979																	1	2	3	3	3	4	4	4	4	3	3	3	4	4	3	5
15980																	1	5
15981																	1	5
15982																	1	5
15983																	1	2	2	2	3	3	3	5
15984																	1	2	2	3	4	3	5
15985																	1	5
15986																	1	5
15987																	1	5
15988																	1	5
15989																	1	5
15990																	1	5
15991																	1	5
15992																	1	5
15993																	1	5
15994																	1	5
15995																	1	5
15996																	1	5
15997																	1	5
16001																	1	5
16002																	1	5
16003																	1	5
15823																	1	5
15824																		0	5
15825																		1	5
15826																		1	5
15827																		1	2	2	3	3	3	3	4	3	4	3	5
15828																		1	5
15829																		1	5
15830																		1	5
15831																		1	5
15832																		1	5
15833																		1	5
15834																		1	5
15835																		1	5
15836																		1	5
15837																		1	5
15838																		1	5
15839																		1	5
15840																		1	5
15841																		1	2	2	2	2	2	3	3	4	3	5
15842																			3	4	4	3	5
16005																		3	3	3	3	5
16016																		1	5
16017																		1	5
16018																		1	5
16019																		1	2	2	3	5
16020																		1	5
16021																		1	2	2	2	2	2	3	3	3	3	5
16022																		1	5
16023																		1	5
16024																		1	5
16025																		1	5
16026																		1	5
16027																		1	5
16028																		1	5
16029																		1	5
16030																		1	5
16031																		1	5
16032																		1	5
16033																		1	5
16034																		1	5
16035																		1	5
16036																		1	5
16037																		1	5
16038																		1	2	3	4	4	3	4	4	3	3	4	3	3	4	3	5
16039																		1	5
16040																		1	5
16041																		1	5
16042	m																	1	2	2	3	3	3	5
16043																		1	5
16044																		1	5
16045																		1	5
16046																		1	5
16047																		1	5
16048																		1	5
16049																		1	5
16050																		1	5
16051																		1	5
16052																		1	5
16053																		1	5
16054																		1	5
16055																		1	2	2	3	3	3	4	4	3	3	3	4	3	3	3	3	3	3
16056																		1	5
16057																		1	5
16058																		1	5
16059																		1	5
16060																		1	5
16061																		1	5
16062																		1	5
16063																		1	5
16064																		1	5
16065																		1	5
16066																		1	5
16067																		1	5
16068																		1	5
16327																		1	5
16329																		1	5
16330																		1	5
15846																			0	5
16349																			3	5
16350																			3	3	3	3	3	3	3	3	5
16351																			3	3	3	5
16358																			3	3	3	4	4	3	3	4	3	4	3	3	3	3	3	4	3
16359																			3	3	3	3	3	3	3	3	3	4	3	3	3	3	3	3
16437																			1	2	2	2	3	4	4	4	3	4	4	4	4	3	3
16438																			1	5
16439																			1	5
16440																			1	5
16441																			1	5
16442																			1	5
16443																			1	5
16444																			1	5
16445																			1	5
16446																			1	5
16447																			1	5
16448																			1	5
16449																			1	5
16450																			1	5
16451																			1	2	2	2	3	5
16452																			1	5
16453																			1	5
16454																			1	5
16455																			1	5
16456																			1	5
16457																			1	5
16458																			1	5
15843	m																				3	3	3	4	3	3	3	3	3	5
15844	m																				3	5
15845	f																				3	5
16531	m																			1	5
16532	f																			1	5
16533	m																			1	2	2	2	3	3	3	3	3	5
16534	m																			1	5
16535	m																			1	5
16536	f																			1	5
16537	f																			1	5
16538	f																			1	2	2	2	2	2	3	5
16539	f																			1	5
16540	f																			1	5
16541	m																			1	5
16542	m																			1	5
16543	f																			1	2	2	3	3	3	3	3	5
16544	m																			1	2	2	2	2	2	3	3	3	3	3	3	3	3	3	3
16545	f																			1	2	2	3	3	4	4	4	3	3	3	3	3	5
16546	m																			1	5
16547	m																			1	5
16548	m																			1	5
16549	f																			1	5
16550	f																			1	5
16551	f																			1	5
16552	m																			1	5
16553	f																			1	5
16561	f																			1	5
16562	f																			1	2	2	2	3	4	4	3	3	3	5
16563	f																			1	5
16564	f																			1	5
16565	f																			1	5
16566	m																			1	5
16567	f																			1	5
16571	f																			1	2	2	3	5
16573	f																			1	5
16574	f																			1	5
16575	f																			1	5
16576	f																			1	5
16577	f																			1	5
16578	f																			1	5
16579	m																			1	5
16580	f																			1	5
17002	m																		1	5
17003	m																			3	4	4	4	3	4	4	3	3	3	5
17005	f																			3	3	5
17006	f																			3	3	5
17007	m																		1	5
17008	m																			3	3	3	3	3	3	3	3	3	3	5
17009																			1	5
17010																			1	5
17011	m																			3	5
17012																				0	5
17013																			1	5
17014	f																			3	3	5
17015	f																		1	2	2	3	3	3	3	3	4	3	4	3	5
17016	f																			1	5
17017	f																			1	5
17018	m																			1	5
17019	f																			1	2	2	3	3	4	3	3	3	5
17020	m																			1	5
17021	m																			1	5
17022	f																			1	5
17023	m																			1	2	2	2	2	3	3	3	3	4	4	4	3	3	3
17024	m																			1	5
17025	m																			1	5
17026	f																			1	5
17027	m																			1	5
17028	f																			1	5
17029	f																			1	5
17030	m																			1	5
17031	m																			1	5
17032	m																			1	5
17033	f																			1	5
17034	f																			1	5
17035	f																			1	5
17036	f																			1	5
17037	m																			1	5
17038	m																			1	5
17039	m																			1	5
17040	m																			1	5
17041	f																			1	5
17042	f																			1	2	2	2	3	3	3	4	4	3	3	3	3	3	4	3
17043	m																			1	2	2	3	4	3	3	4	4	3	3	4	3	3	3	3
17044	f																			1	5
17045	f																			1	2	2	2	3	5
17046	f																			1	2	2	3	5
17047	m																			1	5
17048	f																			1	5
17049	f																			1	2	2	3	3	5
17050	m																			1	5
13563	m																				1	5
13564	f																				1	5
13565	m																				1	5
13566	f																				1	5
13567	f																				1	5
13568	f																				1	5
13569	f																				1	2	2	3	5
13570	m																				1	5
13571	f																			1	5
13572	m																				3	4	3	3	3	3	3	3	3	3	4	3	5
13573	m																			1	5
13574	m																			1	5
13575	m																				1	5
13576	f																				1	5
13577	m																				1	5
13578	f																				1	5
13579	f																				1	5
13580	f																				1	5
13581	m																				0	5
13582	m																				0	5
13583	m																			1	5
13584																							3	4	3	3	3	4	4	3	3	5
13585																				1	2	2	3	3	5
13586	m																				0	5
13587	m																			1	5
13589	m																				1	5
13591	m																					3	4	3	3	5
13592	f																				3	3	3	3	3	3	3	3	5
13594	m																				1	3	3	3	3	3	3	3	5
13595	m																						3	3	3	4	3	3	3	3	4	3	3	3
13596	m																						3	4	3	3	4	3	4	3	3	3	5
13597	f																				0	5
13598	m																				3	4	4	4	3	3	5
13599	m																					3	4	3	3	3	5
13600	f																			1	5
14308																		3	3	3	3	4	3	4	4	3	3	5
16554	m																			1	5
16555	m																				0	5
16556	m																				0	5
16557	m																						3	5
16558	f																				0	5
16559	m																				0	5
16560	m																					3	3	3	3	3	3	5
16568	m																				0	5
16570	m																			1	5
16572																				1	5
17180																					0	5
17601	f																				1	5
17602	f																				1	5
17603	m																				1	5
17604	m																				1	5
17605	f																				1	5
17606	m																				1	5
[truncated: 969 more rows]

## Sheet: co-variates
year	HadISST_anomaly 1880-2015	HadISST_anomaly 1953-2015	sst_anomaly_austral	sst_anomaly_mar_june	sst_anomaly_minus_1yr	sst_anomaly_minus_2yr	total_rainfall_may_may	total_rainfall_annual	wet_days_mar_may	wet_days_annual	max_1day_rain_mar_may	max_1day_rain_annual	mean_air_temp_mar_may	mean_air_temp_annual	daily_min_temp_mar_may	daily_min_temp_annual	days_wind_gusts_33_mar_may	days_wind_gusts_33_annual
1982	-0.572685	-0.87903	-0.792553	0.339233	0.221434	0.05509	65.3	79.7727	8	11.3636	18.8	26.0818	10.35	10.2636	7.15	6.68182	9	10.2727
1983	-0.193093	-0.0879687	-0.161389	-1.14294	-0.792553	0.221434	116.55	68.8727	11.5	9.54545	39.95	22.2091	9.55	10.5727	6.2	7.23636	9.5	8.09091
1984	0.329717	0.558515	0.533835	0.191655	-0.161389	-0.792553	59.85	53.42	10.5	9.4	15.7	14.86	10.2	11.44	6.85	8.04	9	8.5
1985	0.485933	0.78738	0.504168	0.656625	0.533835	-0.161389	36.4	71.1727	10	10.7273	5.5	23.5727	9.3	11.3455	6.1	7.98182	4	8.63636
1986	-0.0531613	0.212493	0.141783	0.230933	0.504168	0.533835	54.75	79.4909	9.5	10.0909	26.1	23.9182	11.3	11.2727	7.7	7.99091	9.5	9.27273
1987	-0.47151	-0.0552661	-0.415523	0.0343175	0.141783	0.504168	93.6	76.2333	8	10	29.3	23.5889	11.35	11.3778	7.6	7.85556	10.5	9.77778
1988	-0.423348	0.0625774	0.248766	-1.0574	-0.415523	0.141783	50.45	49.9818	7	9.27273	20.3	12.5818	8.95	11.5273	5.2	7.81818	8	10.7273
1989	0.352604	0.413536	0.568544	-0.0127025	0.248766	-0.415523	40.7	51.3091	10	9.45455	10.25	12.2545	10.65	11.3636	7.45	7.73636	9.5	7.90909
1990	-0.308405	-0.226275	-0.208887	0.237407	0.568544	0.248766	45.4	89.2818	11.5	11.2727	11.8	24.6273	10.95	10.5909	7.05	7.13636	12.5	10.5455
1991	-0.745445	-0.660293	-0.788172	-0.27176	-0.208887	0.568544	67.3	57.2273	12.5	9.18182	13.85	17.3182	10.25	9.98182	6.95	6.52727	8.5	9
1992	-0.736129	-0.478997	-0.789603	-1.50567	-0.788172	-0.208887	45.9	82.1273	10	10.4545	13	25.6455	8.7	10.0545	5.15	6.81818	8.5	9.18182
1993	-0.484395	-0.115188	-0.141044	-0.501232	-0.789603	-0.788172	77.55	75.0818	12	10	25.55	21.3818	10.1	10.7545	7.1	7.24545	9	8.36364
1994	-0.51654	-0.275502	0.0334017	-0.230735	-0.141044	-0.789603	29.7	55.6818	8.5	8.81818	6.15	16.6818	10.8	10.6636	7	7.09091	8.5	11.5455
1995	-0.225446	-0.0730541	-0.116773	0.37238	0.0334017	-0.141044	25.45	64.8	5	12.3	12.05	15.91	10.9	11.03	7.45	7.56	11	11.2
1996	-0.0913713	-0.00924511	0.0526925	0.292162	-0.116773	0.0334017	64.7	83.29	13	9.3	17.4	25.68	10.8	10.55	7.3	7.34	10.5	9.1
1997	-0.492309	-0.260676	0.0676608	0.132678	0.0526925	-0.116773	87.65	70.08	11	10.1	20.25	20.71	10.55	11.46	7.2	7.64	8.5	9
1998	0.268604	0.474314	0.772381	0.637865	0.0676608	0.0526925	80.15	50.0091	11.5	9.63636	21.85	12.9455	10.6	11.5727	7.15	7.80909	9	7.36364
1999	0.000400988	0.42767	0.301734	1.11482	0.772381	0.0676608	37.95	80.1818	8.5	9.81818	10.1	23.5455	11.7	11.2091	7.8	7.64545	6.5	6.36364
2000	-0.0268995	0.386048	0.422298	0.406443	0.301734	0.772381	55.3	83.7545	9.5	11.3636	13.65	22.9455	11.2	10.4636	7.5	6.80909	4.5	7
2001	0.140623	0.389247	0.581751	0.520362	0.422298	0.301734	54.65	88.5455	11	12.4545	11.15	23.0545	10.3	11.2091	6.8	7.89091	8.5	6.36364
2002	-0.222613	-0.0400792	0.232349	0.47133	0.581751	0.422298	90.15	52.1364	10.5	9.27273	26.3	14.9636	10.8	11.0091	7.65	7.28182	8	7.54545
2003	-0.462191	-0.395646	-0.143255	0.668805	0.232349	0.581751	41.3	62.05	7	10.3	12.75	21.22	10.35	10.89	6.9	7.17	5.5	8.3
2004	-0.261748	-0.228942	-0.159649	-0.35794	-0.143255	0.232349	83.2	72.82	11	9.8	33.55	23.08	9.85	10.7	6.8	7.12	5.5	7.4
2005	0.169349	0.24846	0.700145	0.233482	-0.159649	-0.143255	40.5	69.2364	9	10.7273	11.8	26.3182	10.2	11.2636	6.1	7.64545	6	6.81818
2006	-0.377229	-0.194839	0.34295	0.358495	0.700145	-0.159649	102.45	56.52	10	11.1	62.35	14.24	11.25	11.19	8.2	7.33	7.5	3.6
2007	-0.430449	0.0346748	0.624387	0.741173	0.34295	0.700145	30.8	79.2636	9.5	10.2727	6.3	29.3727	11.1	11.0636	7.35	7.4	2.5	3.09091
2008	-0.431007	-0.258746	0.337531	0.82168	0.624387	0.34295	85.65	83.6727	10	9.81818	20.9	21.8364	10.2	10.6818	7	7	2.5	2.45455
2009	-0.493368	-0.301056	0.0634917	0.163895	0.337531	0.624387	119.8	64.5727	12.5	8.09091	18.1	21.6727	9.85	10.9636	6.25	7.31818	4	3.09091
2010	0.0584852	0.148441	0.177022	0.209398	0.0634917	0.337531	146.4	72.4727	8	8.63636	41.7	29.2909	11.3	11.4727	8	7.97273	0.5	2.81818
2011	-0.0598577	-0.10073	-0.283135	0.342303	0.177022	0.0634917	75.1	61.6	10	8.3	35.4	25.16	11.3	10.29	7.95	6.65	2.5	3.2
2012	-0.0542526	0.0904972	0.497493	-0.0446625	-0.283135	0.177022	28.7	97.2909	7	10.0909	8.2	31.6364	10.9	11.2182	7.1	7.57273	2	3.18182
2013	0.211	0.146383	0.77015	0.94098	0.497493	-0.283135	125.1	67.5364	11	8.81818	45	17.5545	10.8	11.4	7.3	7.8	1	3.63636
2014	0.254071	0.200411	0.240274	0.483372	0.77015	0.497493	123	43.1143	13.5	8.85714	36.3	12.6857	11.05	11.6857	7.75	7.92857	4.5	4.71429
